# Supplementary material
Source: ML conference proceedings conference paper supplement (https://proceedings.neurips.cc/paper_files/paper/2020/hash/174f8f613332b27e9e8a5138adb7e920-Abstract.html)
Supplement: Supplementary file [file 174f8f613332b27e9e8a5138adb7e920-Supplemental.pdf]

## Supplementary material

**Full version.** We refer to the full version of this work [18] (arXiv: 2011.06186) for more general results and more complete proofs.

**Organization.** In Appendix A we will present problem-dependent bounds that can be computed from data, where the unknown quantity  $\mathcal{L}^*$  and  $\mathcal{V}^*$  are replaced by some empirical estimates. In Appendix B we will discuss several application areas of our theoretical results. In Appendix C-H, we will present proofs of the theoretical results.

### A Estimating the loss-dependent and variance-dependent rates from data

In the remarks following Theorem 1, we comment that fully data-dependent loss-dependent bounds can be derived using the empirical “effective loss,”  $\mathbb{P}_n[\ell(\hat{h}_{\text{ERM}}; z) - \inf_{\mathcal{H}} \ell(h; z)]$  to estimate the unknown parameter  $\mathcal{L}^*$ . Here we present the full details and some discussion of this approach.

**Corollary 3 (estimate of the loss-dependent rate from data).** *Recall the term  $\mathcal{L}^*$  is  $\mathbb{P}[\ell(h^*; z) - \inf_{\mathcal{H}} \ell(h^*; z)]$  and denote  $\widehat{\mathcal{L}}^* = \mathbb{P}_n[\ell(\hat{h}_{\text{ERM}}; z) - \inf_{\mathcal{H}} \ell(h; z)]$ . Under the conditions of Theorem 1, setting  $C_n = 2 \log_2 n + 6$ , then for any fixed  $\delta \in (0, \frac{1}{2})$ , with probability at least  $1 - 2\delta$ , we have*

$$\mathcal{E}(\hat{h}_{\text{ERM}}) \leq \psi \left( cB\widehat{\mathcal{L}}^*; \frac{\delta}{C_n} \right) \vee \frac{cr^*}{B} \vee \frac{cB \log \frac{2}{\delta}}{n} \quad (\text{A.1})$$

and

$$\mathcal{L}^* \leq c_1 \left( \widehat{\mathcal{L}}^* \vee \frac{r^*}{B} \vee \frac{B \log \frac{2}{\delta}}{n} \right) \leq c_2 \left( \mathcal{L}^* \vee \frac{r^*}{B} \vee \frac{B \log \frac{2}{\delta}}{n} \right), \quad (\text{A.2})$$

where  $c, c_1, c_2$  are absolute constants.

**Remarks.** 1) The  $B \log \frac{2}{\delta}/n$  terms (A.1) and (A.2) are negligible, because  $r^*$  is at least of order  $B^2 \log \frac{1}{\delta}/n$  for most practical applications. This order is unavoidable in traditional “local Rademacher complexity” analysis and two-sided concentration inequalities.

2) The generalization error bound (A.1) shows that without knowledge of  $\mathcal{L}^*$ , one can estimate the order of our loss-dependent rate by using  $\widehat{\mathcal{L}}^* = \mathbb{P}_n[\ell(\hat{h}_{\text{ERM}}; z) - \inf_{\mathcal{H}} \ell(h; z)]$  as a proxy. Despite replacing  $\mathcal{L}^*$  by  $\widehat{\mathcal{L}}^*$ , other quantities in the bound remain unchanged in order.

3) The inequality (A.2) shows that the estimation of  $\mathcal{L}^*$  is tight.

The proof of Corollary 3 can be found in Appendix F.

In the remark following Theorem 2, we comment that fully data-dependent variance-dependent bounds can be derived by employing an empirical estimate to the unknown parameter  $\mathcal{V}^*$ . Here we present the full details and some discussion of this approach.

**Corollary 4 (estimate of the variance-dependent rate from data).** *Consider the empirical centered second moment*

$$\widehat{\mathcal{V}}^* := \mathbb{P}_n \left[ \ell(\hat{h}_{\text{NMP}}; z) - \widehat{\mathcal{L}}_0^* \right]^2,$$

where  $\widehat{\mathcal{L}}_0^* \in [-B, B]$  is the preliminary estimate of  $\mathcal{L}^*$  obtained in the first-stage,  $\psi$  is defined in Strategy 2, and

$$\hat{h}_{\text{NMP}} \in \arg \min_{\mathcal{H}} \mathbb{P}_n \ell(h; z) - 2\psi \left( 16\mathbb{P}_n \left[ (\ell(h; z) - \widehat{\mathcal{L}}_0^*)^2 \right] \right).$$

For any fixed  $\delta \in (0, 1)$ , by performing the moment-penalized estimator in Strategy 2, with probability at least  $1 - \delta$ ,

$$\mathcal{E}(\hat{h}_{\text{MP}}) \leq 4\psi \left( 16\widehat{\mathcal{V}}^*; \frac{\delta}{C_n} \right) \vee \frac{r^*}{8B}, \quad (\text{A.3})$$

where  $r^*$  is the fixed point of  $16B\psi(r; \frac{\delta}{C_n})$ .

**Remarks.** 1) The subscript ‘‘NMP’’ within  $\hat{h}_{\text{NMP}}$  means ‘‘negative moment penalization.’’ Note that  $\hat{h}_{\text{NMP}}$  may not have good generalization performance, it is only used to compute  $\widehat{\mathcal{V}}^*$  so that we can evaluate the estimator  $\hat{h}_{\text{MP}}$  proposed in Strategy 2.

2) While the fully data-dependent generalization error bound (A.3) provides a way to evaluate the moment-penalized estimator in Strategy 2 from training data, it seems that  $\widehat{\mathcal{V}}^*$  and  $\mathcal{V}^*$  are not necessarily of the same order. Therefore, (A.3) may not be as tight as the original variance-dependent rate in Theorem 2. One should view (A.3) as a relaxation of the original variance-dependent rate in Theorem 2.

3) We also comment that the ‘‘sub-root’’ assumption in Theorem 2 is not needed here as we do not discuss the precision of  $\widehat{\mathcal{L}}_0^*$ . It is easy to combine Corollary 4 with the guarantee on  $\widehat{\mathcal{L}}_0^*$  proved in Appendix E.2.

The proof of Corollary 4 can be found in Appendix G.

## B Application areas of problem-dependent rates

In Section 6 we illustrate the advantages of our problem-dependent rates in ‘‘rich’’ non-parametric and VC classes, where we use metric entropy conditions of the loss/excess loss class. In practical applications it is more standard to consider metric entropy conditions of the hypothesis class  $\mathcal{H}$ . In view of this, we introduce two important settings where the metric entropy on the loss/excess loss class can be obtained from metric entropy conditions on the hypothesis class  $\mathcal{H}$ . Thus, the improvements illustrated in Section 6 can be directly transferred to these application areas.

**Supervised learning with Lipschitz continuous cost.** In supervised learning, the data  $z$  is a feature-label pair  $(x, y)$ , and the loss  $\ell(h; z)$  is of the form

$$\ell(h; z) = \ell_{\text{sv}}(h(x), y),$$

where  $\ell_{\text{sv}}$  is a fixed cost function that is  $L_{\text{sv}}$ -Lipchitz continuous with respect to its first argument, namely, Lipschitz with parameter  $L_{\text{sv}}$ . For hypothesis classes characterized by metric entropy conditions, properties are preserved because

$$\log \mathcal{N}(\varepsilon, \ell \circ \mathcal{H}, L_2(\mathbb{P}_n)) \leq \log \mathcal{N}\left(\frac{\varepsilon}{L_{\text{sv}}}, \mathcal{H}, L_2(\mathbb{P}_n)\right).$$

Note that  $L_{\text{sv}}$  only depends on the cost function and is usually of constant order. Our theory naturally applies to supervised learning problems where the cost function is Lipschitz continuous and not strongly-convex (for example, the  $\ell_1$  cost, the hinge cost, the ramp cost, etc.).

**Counterfactual risk minimization.** Denote  $x \in \mathcal{X}$  the feature and  $t \in \mathcal{T}$  the treatment (e.g.  $\mathcal{T} = \{0, 1\}$  in binary treatment experimental design), and  $c(x, t)$  the unknown cost function. A hypothesis (policy)  $h$  is a map from  $\mathcal{X} \times \mathcal{T}$  to  $[0, 1]$  such that  $\sum_{t \in \mathcal{T}} h(x, t) = 1$ . Thus, a hypothesis (policy) essentially maps features to a distribution over treatments. We consider the standard formulation of ‘‘learning with logged bandit feedback,’’ dubbed ‘‘counterfactual risk minimization’’ [15]: a batch of samples  $\{(x_i, t_i, c_i)\}_{i=1}^n$  are obtained by applying a known policy  $h_0$ , so that  $t_i$  is sampled from  $h_0(x_i, \cdot)$  and one can only observe the cost  $c_i$  associated with  $t_i$ . We write  $z = (x, t, c)$  and let

$$\ell(h; z_i) = \frac{c_i}{h_0(x_i, t_i)} h(x_i, t_i), \quad (\text{B.1})$$

be the ‘‘constructed loss’’ using importance sampling. It is straightforward to show that the population risk  $\mathbb{P}\ell(h; z)$  is equal to the expected cost of policy  $h$ , so determining good policies requires one to minimize the generalization error  $\mathcal{E}(\hat{h})$ . It is usually convenient to obtain metric entropy condition of the loss/excess loss class by using the linearity structure of (B.1). In particular, from the Cauchy-Schwartz inequality we can prove that

$$\log \mathcal{N}(\varepsilon, \ell \circ \mathcal{H}, L_2(\mathbb{P}_n)) \leq \log \mathcal{N}\left(\frac{\varepsilon}{\gamma_n}, \mathcal{H}, L_4(\mathbb{P}_n)\right), \quad (\text{B.2})$$

where  $\gamma_n := \sqrt[4]{\mathbb{P}_n \left[ \left( \frac{c(x, t)}{h_0(x, t)} \right)^4 \right]}$  only depends on the functions  $c, h_0$  in the given problem, and the samples rather than the worst-case parameters. A systematical challenge in counterfactual risk

minimization is that the worst-case boundedness parameter,  $\sup_{h,z} |\ell(h; z)|$ , is typically very large, since the inverse probability term  $\frac{1}{h_0(x_i, t_i)}$  in (B.1) is typically large in the worst case.

## C Proof of Proposition 1

Given any  $r_0 \in (0, R]$ , take  $r_k = 2^k r_0$ ,  $k = 1, \dots, \lceil \log_2 \frac{R}{r_0} \rceil$ . Note that  $\lceil \log_2 \frac{R}{r_0} \rceil \leq \log_2 \frac{2R}{r_0}$ .

We use a union bound to establish that  $\sup_{T(f) \leq r} (\mathbb{P} - \mathbb{P}_n)f \leq \psi(r; \delta)$  holds for all these  $r_k$  simultaneously:  $\forall \delta \in (0, 1)$ , with probability at least  $1 - \delta$ ,

$$\sup_{T(f) \leq r_k} (\mathbb{P} - \mathbb{P}_n)f \leq \psi \left( r_k; \frac{\delta}{\log_2 \frac{2R}{r_0}} \right), \quad k = 1, \dots, \left\lceil \log_2 \frac{R}{r_0} \right\rceil.$$

For any fixed  $f \in \mathcal{F}$ , if  $T(f) \leq r_0$  is false, then let  $k$  be the non-negative integer such that  $2^k r_0 < T(f) \leq 2^{k+1} r_0$ , we further know that  $r_{k+1} = 2^{k+1} r_0 \leq 2T(f)$ . Therefore, with probability at least  $1 - \delta$ ,

$$\begin{aligned} (\mathbb{P} - \mathbb{P}_n)f &\leq \sup_{\tilde{f} \in \mathcal{F}: T(\tilde{f}) \leq r_{k+1}} (\mathbb{P} - \mathbb{P}_n)\tilde{f} \\ &\leq \psi \left( r_{k+1}; \frac{\delta}{\log_2 \frac{2R}{r_0}} \right) \\ &\leq \psi \left( 2T(f); \frac{\delta}{\log_2 \frac{2R}{r_0}} \right). \end{aligned}$$

Therefore, with probability at least  $1 - \delta$ ,  $\forall f \in \mathcal{F}$ , either  $T(f) \leq r_0$  or

$$(\mathbb{P} - \mathbb{P}_n)f \leq \psi \left( 2T(f); \frac{\delta}{\log_2 \frac{2R}{r_0}} \right).$$

This completes the proof.  $\square$

## D Proof of Theorem 1

Let  $\mathcal{F}$  be the excess loss class in (3.2). Clearly, its members  $f$  are uniformly bounded in  $[-2B, 2B]$ . Let  $T(f) = \mathbb{P}[f^2]$ . Define  $\hat{f}$  by  $\hat{f}(z) = \ell(\hat{h}_{\text{ERM}}; z) - \ell(h^*; z)$ ,  $\forall z \in \mathcal{Z}$ .

For a fixed  $r_0 \in (0, 4B^2)$ , Denote  $C_{r_0} = 2 \log_2 \frac{8B^2}{r_0}$ . Then from Proposition 1 we know with probability at least  $1 - \frac{\delta}{2}$ , either  $T(\hat{f}) \leq r_0$  or

$$(\mathbb{P} - \mathbb{P}_n)\hat{f} \leq \psi \left( 2T(\hat{f}); \frac{\frac{\delta}{2}}{\log_2 \frac{8B^2}{r_0}} \right) = \psi \left( 2T(\hat{f}); \frac{\delta}{C_{r_0}} \right). \quad (\text{D.1})$$

We denote the events  $\mathcal{A}_1 = \{T(\hat{f}) \leq r_0\}$  and  $\mathcal{A}_2 = \{\text{inequality (D.1) holds true}\}$ , then we have

$$\text{Prob}(\mathcal{A}_1) + \text{Prob}(\mathcal{A}_2) \geq 1 - \frac{\delta}{2}.$$

Consider the event  $\mathcal{A}_1$ . From the surrogate property of  $\psi$ , we have

$$\text{Prob} \left( \mathcal{A}_1 \cap \left\{ (\mathbb{P} - \mathbb{P}_n)\hat{f} \leq \psi(2r_0; \frac{\delta}{C_{r_0}}) \right\} \right) \geq \text{Prob}(\mathcal{A}_1) - \frac{\delta}{C_{r_0}} \geq \text{Prob}(\mathcal{A}_1) - \frac{\delta}{2}.$$

Combine the events  $\mathcal{A}_1$  and  $\mathcal{A}_2$ , we have

$$\text{Prob} \left( \left\{ (\mathbb{P} - \mathbb{P}_n)\hat{f} \leq \psi \left( 2T(\hat{f}) \vee 2r_0; \frac{\delta}{C_{r_0}} \right) \right\} \right) \geq \text{Prob}(\mathcal{A}_1) - \frac{\delta}{2} + \text{Prob}(\mathcal{A}_2) \geq 1 - \delta.$$

From the property of ERM we have  $\mathbb{P}_n \hat{f} \leq 0$ , so with probability at least  $1 - \delta$ ,

$$\mathcal{E}(\hat{h}_{\text{ERM}}) \leq (\mathbb{P} - \mathbb{P}_n) \hat{f} \leq \psi \left( 2T(\hat{f}) \vee 2r_0; \frac{\delta}{C_{r_0}} \right). \quad (\text{D.2})$$

From now to the end of this proof, we will prove the generalization error bound on the event

$$\mathcal{A} = \{\text{the inequality (D.2) holds true}\}, \quad (\text{D.3})$$

whose measure is at least  $1 - \delta$ . Define  $\hat{g}$  by  $\hat{g}(z) = \ell(\hat{h}_{\text{ERM}}; z) - \inf_{\mathcal{H}} \ell(h; z), \forall z \in \mathcal{Z}$ . Let  $T(\hat{g}) = \mathbb{P}[\hat{g}^2]$ . We have  $\hat{f}(z) = \hat{g}(z) - (\ell(h^*; z) - \inf_{\mathcal{H}} \ell(h; z)), \forall z$  so that

$$\begin{aligned} \mathbb{P}[\hat{f}^2] &\leq 2\mathbb{P}[\hat{g}^2] + 2\mathbb{P}[(\ell(h^*; z) - \inf_{\mathcal{H}} \ell(h; z))^2] \\ &\leq 2\mathbb{P}[\hat{g}^2] + 4B\mathcal{L}^* \leq 4\mathbb{P}[\hat{g}^2] \vee 8B\mathcal{L}^*. \end{aligned}$$

That is,

$$T(\hat{f}) \leq 4T(\hat{g}) \vee 8B\mathcal{L}^*. \quad (\text{D.4})$$

From (D.2) and (D.4) we have

$$\mathbb{P}\hat{g} - \mathcal{L}^* = \mathcal{E}(\hat{h}_{\text{ERM}}) \leq \psi \left( 8T(\hat{g}) \vee 16B\mathcal{L}^* \vee 2r_0; \frac{\delta}{C_{r_0}} \right). \quad (\text{D.5})$$

Since  $\hat{g}(z) \in [0, 2B]$  for all  $z$ , we have  $T(\hat{g}) \leq 2B\mathbb{P}\hat{g}$ . From this fact and (D.5) we obtain

$$\begin{aligned} T(\hat{g}) &\leq 2B\mathbb{P}\hat{g} \\ &\leq 2B \left( \mathcal{L}^* + \psi \left( 8T(\hat{g}) \vee 16B\mathcal{L}^* \vee 2r_0; \frac{\delta}{C_{r_0}} \right) \right) \\ &= 2B\mathcal{L}^* + 2B\psi \left( 8T(\hat{g}) \vee 16B\mathcal{L}^* \vee 2r_0; \frac{\delta}{C_{r_0}} \right). \end{aligned}$$

Whether  $B\mathcal{L}^*$  is less than  $2B\psi \left( 8T(\hat{g}) \vee 16B\mathcal{L}^* \vee 2r_0; \frac{\delta}{C_{r_0}} \right)$ , or  $B\mathcal{L}^*$  is greater or equal to  $2B\psi \left( 8T(\hat{g}) \vee 16B\mathcal{L}^* \vee 2r_0; \frac{\delta}{C_{r_0}} \right)$ , the above inequality always implies that

$$\begin{aligned} T(\hat{g}) &\leq 3B\mathcal{L}^* \vee 6B\psi \left( 8T(\hat{g}) \vee 16B\mathcal{L}^* \vee 2r_0; \frac{\delta}{C_{r_0}} \right) \\ &\leq 3B\mathcal{L}^* \vee 6B\psi \left( 8T(\hat{g}); \frac{\delta}{C_{r_0}} \right) \vee 6B\psi \left( 16B\mathcal{L}^* \vee 2r_0; \frac{\delta}{C_{r_0}} \right). \end{aligned} \quad (\text{D.6})$$

Let  $r^*$  be the fixed point of  $6B\psi(8r; \frac{\delta}{C_n})$ . From the definition of fixed points whether  $2B\mathcal{L}^* \vee \frac{r_0}{4} \leq r^*$  or  $2B\mathcal{L}^* \vee \frac{r_0}{4} > r^*$ , we always have

$$6B\psi \left( 16B\mathcal{L}^* \vee 2r_0; \frac{\delta}{C_{r_0}} \right) \leq r^* \vee 2B\mathcal{L}^* \vee \frac{r_0}{4}.$$

Combine the above inequality with (D.6), we have

$$T(\hat{g}) \leq 3B\mathcal{L}^* \vee 6B\psi \left( 8T(\hat{g}); \frac{\delta}{C_{r_0}} \right) \vee r^* \vee \frac{r_0}{4}.$$

From the above inequality and again the definition of fixed points, it is straightforward to prove that

$$T(\hat{g}) \leq 3B\mathcal{L}^* \vee r^* \vee \frac{r_0}{4}.$$

Combining the above inequality with (D.4), we have

$$T(\hat{f}) \leq 12B\mathcal{L}^* \vee 4r^* \vee r_0.$$

From the above inequality and (D.2) we have

$$\mathcal{E}(\hat{h}_{\text{ERM}}) \leq (\mathbb{P} - \mathbb{P}_n)\hat{f} \leq \psi\left(24B\mathcal{L}^* \vee 8r^* \vee 2r_0; \frac{\delta}{C_{r_0}}\right), \quad (\text{D.7})$$

which implies that

$$\mathcal{E}(\hat{h}_{\text{ERM}}) \leq \psi\left(24B\mathcal{L}^*; \frac{\delta}{C_{r_0}}\right) \vee \psi\left(8r^* \vee 2r_0; \frac{\delta}{C_{r_0}}\right).$$

Recall that  $r^*$  is the fixed point of  $6B\psi(8r; \frac{\delta}{C_{r_0}})$ . Since  $r^* \vee \frac{r_0}{4} \geq r^*$ , from the definition of fixed points we have

$$6B\psi(8r^* \vee 2r_0; \frac{\delta}{C_{r_0}}) \leq r^* \vee \frac{r_0}{4}.$$

So we finally obtain

$$\mathcal{E}(\hat{h}_{\text{ERM}}) \leq \psi\left(24B\mathcal{L}^*; \frac{\delta}{C_{r_0}}\right) \vee \frac{r^*}{6B} \vee \frac{r_0}{24B}.$$

Recall that the generalization error bound holds true on the event  $\mathcal{A}$  defined in (D.3), whose measure is at least  $1 - \delta$ . This completes the proof.  $\square$

## E Proof of Theorem 2

The main goal of this subsection is to prove Theorem 2. We first prove Theorem 5 (the bound (5.2) in the main paper), a guarantee for the second-stage moment penalized estimator  $\hat{h}_{\text{MP}}$ . In order to prove Theorem 2, we then combine Theorem 5 with a guarantee for the first-stage empirical risk minimization (ERM) estimator.

### E.1 Analysis for the second-stage moment-penalized estimator

**Theorem 5 (variance-dependent rate of the second-stage estimator).** *Given arbitrary preliminary estimate  $\mathcal{L}_{S'}^* \in [-B, B]$ , the generalization error of the moment-penalized estimator  $\hat{h}_{\text{MP}}$  in Strategy 2 is bounded by*

$$\mathcal{E}(\hat{h}_{\text{MP}}) \leq 2\psi\left(c_0 [\mathcal{V}^* \vee (\mathcal{L}_{S'}^* - \mathcal{L}_0^*)^2 \vee r^*]; \frac{\delta}{C_n}\right),$$

with probability at least  $1 - \delta$ , where  $c_0$  is an absolute constant and  $r^*$  is the fixed point of  $16B\psi(r; \frac{\delta}{C_n})$ .

**Proof of Theorem 5:** the proof of Theorem 5 consist of four parts.

#### Part I: use $\psi$ to upper bound localized empirical processes

**Lemma 1 (bound on localized empirical processes).** *Given a fixed  $\delta_1 \in (0, 1)$ , let  $r_1^*(\delta_1)$  be the fixed point of  $16B\psi(r; \delta_1)$  where  $\psi$  is defined in Strategy 2. Then with probability at least  $1 - \delta_1$ , for all  $r > 0$ ,*

$$\sup_{\mathbb{P}[f^2] \leq r} (\mathbb{P} - \mathbb{P}_n)f \leq \psi(r \vee r_1^*(\delta_1); \delta_1). \quad (\text{E.1})$$

**Proof of Lemma 1:** Recall that  $\mathcal{F}$  is the excess loss class in (3.2). Clearly, its members  $f$  are uniformly bounded in  $[-2B, 2B]$ . When  $\mathbb{P}[f^2] \leq r$ , we have  $\mathbb{P}[f^4] \leq 4B^2r$ . From Lemma 4 (the two-sided version of its second inequality), with probability at least  $1 - \frac{\delta_1}{2}$ ,

$$\begin{aligned} & \sup_{\mathbb{P}[f^2] \leq r} |(\mathbb{P} - \mathbb{P}_n)f^2| \\ & \leq 4\mathfrak{R}_n\{f^2 : \mathbb{P}[f^2] \leq r\} + 2B\sqrt{\frac{2r \log \frac{8}{\delta_1}}{n} + \frac{18B^2 \log \frac{8}{\delta_1}}{n}} \\ & \leq 16B\mathfrak{R}_n\{f : \mathbb{P}[f^2] \leq r\} + 2B\sqrt{\frac{2r \log \frac{8}{\delta_1}}{n} + \frac{18B^2 \log \frac{8}{\delta_1}}{n}}, \end{aligned}$$

where the last inequality follows from the Lipchitz contraction property of Rademahcer complexity (see, e.g., [10, Theorem 7]), and the fact that for all  $f_1, f_2 \in \mathcal{F}$ ,  $|f_1^2(z) - f_2^2(z)| \leq 4B|f_1(z) - f_2(z)|$ . We conclude that with probability at least  $1 - \frac{\delta_1}{2}$ ,

$$\sup_{\mathbb{P}[f^2] \leq r} |(\mathbb{P} - \mathbb{P}_n)f^2| \leq \varphi_{\delta_1}(r), \quad (\text{E.2})$$

where  $\varphi_{\delta_1}(r) := 16B\mathfrak{R}_n\{f : \mathbb{P}[f^2] \leq r\} + 2B\sqrt{\frac{2r \log \frac{8}{\delta_1}}{n}} + \frac{18B^2 \log \frac{8}{\delta_1}}{n}$ .

Denote  $r_2^*(\delta_1)$  the fixed point of  $4\varphi_{\delta_1}(r)$  (the fixed point must exist as  $4\varphi_{\delta_1}(r)$  is a non-decreasing, non-negative and bounded function). From (E.2) and the fact that  $r_2^*(\delta_1)$  is the fixed point of  $4\varphi_{\delta_1}(r)$ , if  $r > r_2^*(\delta_1)$ , then with probability at least  $1 - \frac{\delta_1}{2}$ ,

$$\sup_{\mathbb{P}[f^2] \leq r} |(\mathbb{P} - \mathbb{P}_n)f^2| \leq \frac{r}{4}. \quad (\text{E.3})$$

(E.3) implies that with probability at least  $1 - \frac{\delta_1}{2}$ , for all  $r > r_2^*(\delta_1)$ ,  $\mathbb{P}[f^2] \leq r$  implies that

$$\mathbb{P}_n[f^2] \leq \frac{5}{4}r \leq 2r. \quad (\text{E.4})$$

Again from the two-sided version of the second inequality in Lemma 4, we know that with probability at least  $1 - \frac{\delta_1}{2}$ ,

$$\sup_{\mathbb{P}[f^2] \leq r} |(\mathbb{P} - \mathbb{P}_n)f| \leq 4\mathfrak{R}_n\{f : \mathbb{P}[f^2] \leq r\} + \sqrt{\frac{2r \log \frac{8}{\delta_1}}{n}} + \frac{9B \log \frac{8}{\delta_1}}{n}.$$

Combining the above inequality and (E.4) using a union bound, we know that with probability at least  $1 - \frac{\delta_1}{2} - \frac{\delta_1}{2} = 1 - \delta_1$ , if  $r > r_2^*(\delta_1)$ , then

$$\begin{aligned} \sup_{\mathbb{P}[f^2] \leq r} (\mathbb{P} - \mathbb{P}_n)f &\leq 4\mathfrak{R}_n\{f : \mathbb{P}[f^2] \leq r\} + \sqrt{\frac{2r \log \frac{8}{\delta_1}}{n}} + \frac{9B \log \frac{8}{\delta_1}}{n} \\ &\leq 4\mathfrak{R}_n\{f : \mathbb{P}_n[f^2] \leq 2r\} + \sqrt{\frac{2r \log \frac{8}{\delta_1}}{n}} + \frac{9B \log \frac{8}{\delta_1}}{n}. \end{aligned} \quad (\text{E.5})$$

Recall that the  $\psi$  function satisfies that  $\forall r > 0$ ,

$$4\mathfrak{R}_n\{f : \mathbb{P}_n[f^2] \leq 2r\} + \sqrt{\frac{2r \log \frac{8}{\delta_1}}{n}} + \frac{9B \log \frac{8}{\delta_1}}{n} \leq \psi(r; \delta_1).$$

From this fact and (E.5), we see that with probability at least  $1 - \delta_1$ , for all  $r > 0$ ,

$$\sup_{\mathbb{P}[f^2] \leq r} (\mathbb{P} - \mathbb{P}_n)f \leq \psi(r \vee r_2^*(\delta_1); \delta_1). \quad (\text{E.6})$$

From (E.6), in order to prove the result (E.1) in Lemma 1, we only need to prove that

$$r_2^*(\delta_1) \leq r_1^*(\delta_1). \quad (\text{E.7})$$

Assume this is not true, i.e.  $r_2^*(\delta_1) > r_1^*(\delta_1)$ . Since  $r_1^*(\delta_1)$  is the fixed point of  $16B\psi(r; \delta_1)$ , from the definition of fixed points we have

$$r_2^*(\delta_1) > 16B\psi(r_2^*(\delta_1); \delta_1).$$

From the definitions of  $\psi$  and  $\varphi_{\delta_1}$ , for all  $r > r_1^*(\delta_1)$ ,

$$4\varphi_{\delta_1}(r) \leq 16B\psi(r; \delta_1).$$

From the above two inequalities and  $r_2^*(\delta_1) > r_1^*(\delta_1)$ , we have

$$r_2^*(\delta_1) > 16B\psi(r_2^*(\delta_1); \delta_1) \geq 4\varphi_{\delta_1}(r_2^*(\delta_1)). \quad (\text{E.8})$$

From the fact that  $r_2^*(\delta_1)$  is the fixed point of  $4\varphi_{\delta_1}$ , we have

$$4\varphi_{\delta_1}(r_2^*(\delta_1)) = r_2^*(\delta_1). \quad (\text{E.9})$$

The above two inequalities (E.8) and (E.9) result in a contradiction. So the assumption  $r_2^*(\delta_1) > r_1^*(\delta_1)$  is false. Therefore  $r_2^*(\delta_1) \leq r_1^*(\delta_1)$ , and this completes the proof of Lemma 1.  $\square$

**Part II: a “uniform localized convergence” argument with data-dependent measurement.**

Based on Lemma 1, we will modify the proof of Proposition 1 to obtain a “uniform localized convergence” argument with the data-dependent “measurement” functional  $\mathbb{P}_n[f^2]$ .

**Lemma 2 (a “uniform localized convergence” argument with the data-dependent “measurement” functional).** *Given a fixed  $\delta_1 \in (0, 1)$ , let  $r_1^*(\delta_1)$  be the fixed point of  $16B\psi(r; \delta_1)$  where  $\psi$  is defined in Strategy 2. Then with probability at least  $1 - 2 \left( \log_2 \frac{8B^2 \vee 2r_1^*(\delta_1)}{r_1^*(\delta_1)} \right) \delta_1$ , for all  $f \in \mathcal{F}$  either  $\mathbb{P}[f^2] \leq r_1^*(\delta_1)$ , or*

$$(\mathbb{P} - \mathbb{P}_n)f \leq \psi \left( 4\mathbb{P}_n[f^2]; \delta_1 \right). \quad (\text{E.10})$$

**Proof of Lemma 2:** from the definition of  $\psi$  and the fact that  $r_1^*(\delta_1)$  is the fixed point of  $16B\psi(r; \delta_1)$ , we know that  $r_1^*(\delta_1) \geq \frac{144B^2 \log \frac{8}{\delta_1}}{n} > 0$ . Take  $r_0 = r_1^*(\delta_1)$ .

Take  $R = 4B^2 \vee r_0$  to be a uniform upper bound for  $\mathbb{P}f^2$ , and take  $r_k = 2^k r_0$ ,  $k = 1, \dots, \lceil \log_2 \frac{R}{r_0} \rceil$ . Note that  $\lceil \log_2 \frac{R}{r_0} \rceil \leq \log_2 \frac{2R}{r_0}$ . We use the union bound to establish that  $\sup_{\mathbb{P}[f^2] \leq r} (\mathbb{P} - \mathbb{P}_n)f \leq \psi(r; \delta_1)$  holds for all  $\{r_k\}$  simultaneously: with probability at least  $1 - \log_2 \frac{2R}{r_0} \delta_1$ ,

$$\sup_{\mathbb{P}[f^2] \leq r_k} (\mathbb{P} - \mathbb{P}_n)f \leq \psi(r_k; \delta_1), \quad k = 1, \dots, \left\lceil \log_2 \frac{R}{r_0} \right\rceil.$$

For any fixed  $f \in \mathcal{F}$ , if  $\mathbb{P}[f^2] \leq r_0$  is false, let  $k$  be the non-negative integer such that  $2^k r_0 < \mathbb{P}[g(h; z)^2] \leq 2^{k+1} r_0$ . We further have that  $r_{k+1} = 2^{k+1} r_0 \leq 2\mathbb{P}[f^2]$ . Therefore, with probability at least  $1 - \log_2 \frac{2R}{r_0} \delta_1$ ,

$$\begin{aligned} \mathbb{P}f &\leq \mathbb{P}_n f + \sup_{\tilde{f} \in \mathcal{F}: \mathbb{P}[\tilde{f}^2] \leq r_{k+1}} (\mathbb{P} - \mathbb{P}_n)\tilde{f} \\ &\leq \mathbb{P}_n f + \psi(r_{k+1}; \delta_1) \end{aligned} \quad (\text{E.11})$$

By (E.2) we know that with probability at least  $1 - \frac{\delta_1}{2}$ ,

$$\sup_{\mathbb{P}[f^2] \leq r} (\mathbb{P}[f^2] - \mathbb{P}_n[f^2]) \leq \frac{r}{4}$$

for all  $r > r_0$  (here we have used the fact  $r_0 = r_1^*(\delta_1) \geq r_2^*(\delta_1)$ , which is the result (E.7) in the proof of Lemma 1). From the union bound, with probability at least  $1 - (\log_2 \frac{2R}{r_0} + \frac{1}{2})\delta_1 \geq 1 - 2(\log_2 \frac{2R}{r_0})\delta_1$ , the condition  $r_{k+1} \geq \mathbb{P}[f^2] > r_k$  will imply

$$\mathbb{P}_n[f^2] \geq \mathbb{P}[f^2] - \frac{1}{4}r_{k+1} \geq \frac{1}{4}r_{k+1},$$

so

$$r_{k+1} \leq 4\mathbb{P}_n[f^2].$$

Combining this result with (E.11), we have that for all  $f$  such that  $T(f) > r_0$ , with probability at least  $1 - 2(\log_2 \frac{2R}{r_0})\delta_1$ ,

$$\begin{aligned} \mathbb{P}f &\leq \mathbb{P}_n f + \psi(r_{k+1}; \delta_1) \\ &\leq \mathbb{P}_n f + \psi \left( 4\mathbb{P}_n[f^2]; \delta_1 \right). \end{aligned}$$

We conclude that with probability at least  $1 - 2(\log_2 \frac{2R}{r_0})\delta_1$ , for all  $f \in \mathcal{F}$ , either  $\mathbb{P}[f^2] \leq r_1^*(\delta_1)$ , or

$$(\mathbb{P} - \mathbb{P}_n)f \leq \psi \left( 4\mathbb{P}_n[f^2]; \delta_1 \right).$$

This completes the proof of Lemma 2.  $\square$

**Part III: specify the moment-penalized estimator and its error bound.** We specify the moment-penalized estimator to be

$$\hat{h}_{\text{MP}} = \arg \min_{\mathcal{H}} \left\{ \mathbb{P}_n \ell(h; z) + \psi \left( 16 \mathbb{P}_n [(\ell(h; z) - \mathcal{L}_{S'}^*)^2]; \delta_1 \right) \right\}. \quad (\text{E.12})$$

Define  $\hat{f}$  by  $\hat{f}(z) = \ell(\hat{h}_{\text{MP}}; z) - \ell(h^*; z), \forall z \in \mathcal{Z}$ , We define the event

$$\mathcal{A}_1 = \{\mathbb{P}[\hat{f}^2] \leq r_1^*(\delta_1)\},$$

and event

$$\mathcal{A}_2 = \{\text{the inequality (E.10) holds true at } \hat{f}\}.$$

Lemma 2 has proven that

$$\text{Prob}(\mathcal{A}_1) + \text{Prob}(\mathcal{A}_2) \geq 1 - 2 \left( \log_2 \frac{8B^2 \vee 2r_1^*(\delta_1)}{r_1^*(\delta_1)} \right) \delta_1.$$

Consider the event  $\mathcal{A}_1$  where  $\mathbb{P}[\hat{f}^2] \leq r_1^*(\delta_1)$  holds true. Due to the surrogate property of  $\psi$ ,

$$\text{Prob} \left( \mathcal{A}_1 \cap \left\{ (\mathbb{P} - \mathbb{P}_n) \hat{f} \leq \psi(r_1^*(\delta_1); \delta_1) \right\} \right) \geq \text{Prob}(\mathcal{A}_1) - \delta_1.$$

Combining events  $\mathcal{A}_1$  and  $\mathcal{A}_2$ , we conclude that with probability at least  $1 - 2 \left( \log_2 \frac{8B^2 \vee 2r_1^*(\delta_1)}{r_1^*(\delta_1)} + 1 \right) \delta_1$ , we have

$$(\mathbb{P} - \mathbb{P}_n) \hat{f} \leq \psi \left( 4 \mathbb{P}_n [\hat{f}^2] \vee r_1^*(\delta_1); \delta_1 \right). \quad (\text{E.13})$$

Denote  $w(h; z) = \ell(h; z) - \mathcal{L}_{S'}^*$ . Then  $\hat{f}(z) = w(\hat{h}_{\text{MP}}; z) - w(h^*; z), \forall z \in \mathcal{Z}$ , and we have that

$$\begin{aligned} 4 \mathbb{P}_n [\hat{f}^2] &\leq 8 \mathbb{P}_n [w(\hat{h}_{\text{MP}}; z)^2] + 8 \mathbb{P}_n [w(h^*; z)^2] \\ &\leq 16 \mathbb{P}_n [w(\hat{h}_{\text{MP}}; z)^2] \vee 16 \mathbb{P}_n [w(h^*; z)^2]. \end{aligned}$$

From the above conclusion and (E.13) we obtain with probability at least  $1 - 2 \left( \log_2 \frac{8B^2 \vee 2r_1^*(\delta_1)}{r_1^*(\delta_1)} + 1 \right) \delta_1$ ,

$$\begin{aligned} \mathcal{E}(\hat{h}_{\text{MP}}) + \mathbb{P}_n \ell(h^*; z) &\leq \mathbb{P}_n \ell(\hat{h}_{\text{MP}}; z) + \psi(4 \mathbb{P}_n [\hat{f}^2] \vee r_1^*(\delta_1); \delta_1) \\ &\leq \mathbb{P}_n(\hat{h}_{\text{MP}}; z) + \psi \left( 16 \mathbb{P}_n [w(\hat{h}_{\text{MP}}; z)^2] \vee 16 \mathbb{P}_n [w(h^*; z)^2] \vee r_1^*(\delta_1); \delta_1 \right) \\ &\leq \mathbb{P}_n(\hat{h}_{\text{MP}}; z) + \psi \left( 16 \mathbb{P}_n [w(\hat{h}_{\text{MP}}; z)^2] \delta_1 \right) + \psi \left( 16 \mathbb{P}_n [w(h^*; z)^2] \vee r_1^*(\delta_1); \delta_1 \right). \end{aligned} \quad (\text{E.14})$$

From the definition (E.12) of  $\hat{h}_{\text{MP}}$ , we have

$$\mathbb{P}_n \ell(\hat{h}_{\text{MP}}; z) + \psi \left( 16 \mathbb{P}_n [w(\hat{h}_{\text{MP}}; z)^2]; \delta_1 \right) \leq \mathbb{P}_n \ell(h^*; z) + \psi \left( 16 \mathbb{P}_n [w(h^*; z)^2]; \delta_1 \right) \quad (\text{E.15})$$

Therefore, with probability at least  $1 - 2 \left( \log_2 \frac{8B^2 \vee 2r_1^*(\delta_1)}{r_1^*(\delta_1)} + 1 \right) \delta_1$ ,

$$\begin{aligned} \mathcal{E}(\hat{h}_{\text{MP}}) &\leq \mathbb{P}_n \ell(\hat{h}_{\text{MP}}; z) + \psi \left( 16 \mathbb{P}_n [w(\hat{h}_{\text{MP}}; z)^2]; \delta_1 \right) + \psi \left( 16 \mathbb{P}_n [w(h^*; z)^2] \vee r_1^*(\delta_1); \delta_1 \right) - \mathbb{P}_n \ell(h^*; z) \\ &= \arg \min_{\mathcal{H}} \left\{ \mathbb{P}_n \ell(h; z) + \psi \left( 16 \mathbb{P}_n [w(h; z)^2]; \delta_1 \right) \right\} - \mathbb{P}_n \ell(h^*; z) + \psi \left( 16 \mathbb{P}_n [w(h^*; z)^2] \vee r_1^*(\delta_1); \delta_1 \right) \\ &\leq \psi \left( 16 \mathbb{P}_n [w(h^*; z)^2]; \delta_1 \right) + \psi \left( 16 \mathbb{P}_n [w(h^*; z)^2] \vee r_1^*(\delta_1); \delta_1 \right) \\ &\leq 2 \psi \left( 16 \mathbb{P}_n [w(h^*; z)^2] \vee r_1^*(\delta_1); \delta_1 \right), \end{aligned} \quad (\text{E.16})$$



where the first inequality is due to (E.14) and the second inequality is due to (E.15).

From Bernstein's inequality at the single element  $h^*$ , for any fixed  $\delta_2 \in (0, 1)$ , with probability at least  $1 - \delta_2$ ,

$$\begin{aligned} \mathbb{P}_n[w(h^*; z)^2] &\leq \mathbb{P}[w(h^*; z)^2] + 2B\sqrt{\frac{2\mathbb{P}[w(h^*; z)^2] \log \frac{2}{\delta_2}}{n}} + \frac{4B^2 \log \frac{2}{\delta_2}}{n} \\ &\leq 2\mathbb{P}[w(h^*; z)^2] + \frac{6B^2 \log \frac{2}{\delta_2}}{n}. \end{aligned}$$

Therefore, we conclude that with probability at least  $1 - 2 \left( \log_2 \frac{8B^2 \vee 2r_1^*(\delta_1)}{r_1^*(\delta_1)} + 1 \right) \delta_1 - \delta_2$ ,

$$\begin{aligned} \mathcal{E}(\hat{h}_{\text{MP}}) &\leq 2\psi \left( 16\mathbb{P}_n[w(h^*; z)] \vee r_1^*(\delta_1) \vee \frac{B^2}{n}; \delta_1 \right) \\ &\leq 2\psi \left( \left( 32\mathbb{P}[w(h^*; z)^2] + \frac{96B^2 \log \frac{2}{\delta_2}}{n} \right) \vee r_1^*(\delta_1) \vee \frac{B^2}{n}; \delta_1 \right). \end{aligned} \quad (\text{E.17})$$

#### Part IV: final steps.

From the definition of  $\psi$  and the fact that  $r_1^*(\delta_1)$  is the fixed point of  $16B\psi(r; \delta_1)$ , we know that

$$r_1^*(\delta_1) \geq \frac{144B^2 \log \frac{8}{\delta_1}}{n}. \quad (\text{E.18})$$

Denote  $C_n := 4 \log_2 n + 10 \geq 4 \log_2$  and take

$$\delta_1 = \frac{\delta}{C_n}, \quad (\text{E.19})$$

then we have

$$\begin{aligned} 4 \log_2 \frac{8B^2 \vee 2r_1^*(\delta_1)}{r_1^*(\delta_1)} + 6 &\leq \max \left\{ 4 \log_2 \frac{8n}{144 \log 8}, 4 + 6 \right\} \\ &\leq \max\{4 \log_2 n, 10\} \leq C_n, \end{aligned}$$

so

$$\left( 2 \log_2 \frac{8B^2 \vee 2r_1^*(\delta_1)}{r_1^*(\delta_1)} + 3 \right) \delta_1 \leq \frac{\delta}{2}.$$

Set  $r^* = r_1^*(\delta_1)$  and take  $\delta_2 = \frac{\delta}{2}$ . From (E.17), we obtain that with probability at least  $1 - \delta$ , the generalization error of  $\hat{h}_{\text{MP}}$  is upper bounded by

$$\mathcal{E}(\hat{h}_{\text{MP}}) \leq 2\psi \left( c \left[ \mathbb{P}[w(h^*; z)^2] \vee r^* \vee \frac{B^2 \log \frac{4}{\delta}}{n} \right]; \frac{\delta}{C_n} \right), \quad (\text{E.20})$$

where  $c$  is an absolute constant. From (E.18) we have  $r_1^*(\delta_1) \geq \frac{144B^2 \log \frac{8C_n}{\delta}}{n} \geq \frac{B^2 \log \frac{4}{\delta}}{n}$ . Combine this fact with the inequality (E.20), we obtain that

$$\begin{aligned} \mathcal{E}(\hat{h}_{\text{MP}}) &\leq 2\psi \left( c \left[ \mathbb{P}[(\ell(h^*; z) - \mathcal{L}_{S'}^*)^2] \vee r^* \right]; \frac{\delta}{C_n} \right) \\ &\leq 2\psi \left( c_0 \left[ \mathcal{V}^* \vee r^* \vee (\mathcal{L}_{S'}^* - \mathcal{L}_0^*)^2 \right]; \frac{\delta}{C_n} \right). \end{aligned} \quad (\text{E.21})$$

where  $c_0$  is an absolute constant. This completes the proof of Theorem 5.  $\square$

## E.2 Analysis of the first-stage ERM estimator

After proving Theorem 5, the remaining part needed to prove Theorem 2 is to bound  $(\mathcal{L}_{S'}^* - \mathcal{L}_0^*)^2$ —the error of the first-stage ERM estimator.

**The remaining steps in the proof of Theorem 2:** We will give a guarantee on the first-stage ERM estimator, and combine this guarantee with Theorem 5 to prove Theorem 2. Recall that  $\mathbb{P}_{S'}$  is the empirical distribution of the ‘‘auxiliary’’ data set. Denote  $\hat{h}_{\text{ERM}} \in \arg \min_{\mathcal{H}} \mathbb{P}_{S'} \ell(h; z)$ .

From Part I in the proof of Theorem 5,  $\forall \delta \in (0, \frac{1}{2})$ , with probability at least  $1 - \delta$ ,

$$\sup_{\mathcal{F}} |(\mathbb{P} - \mathbb{P}_n)f| \leq \psi(4B^2; \delta) \leq \psi\left(4B^2; \frac{\delta}{C_n}\right).$$

Since  $\psi$  is sub-root with respect to its first argument, we have

$$\frac{\psi(4B^2; \frac{\delta}{C_n})}{\sqrt{4B^2}} \leq \frac{\psi(r^*; \frac{\delta}{C_n})}{\sqrt{r^*}} = \frac{\sqrt{r^*}}{16B},$$

where  $r^*$  is the fixed point of  $16B\psi(r; \frac{\delta}{C_n})$ . So we have proved that  $\psi(4B^2; \frac{\delta}{C_n}) \leq \frac{\sqrt{r^*}}{8}$ . Therefore,

$$\sup_{\mathcal{F}} |(\mathbb{P} - \mathbb{P}_n)f| \leq \frac{\sqrt{r^*}}{8}.$$

Because  $\hat{h}_{\text{ERM}} \in \arg \min_{\mathcal{H}} \mathbb{P}_{S'} \ell(h; z)$  and  $\mathbb{P}_{S'} \ell(\hat{h}_{\text{ERM}}; z) = \mathcal{L}_{S'}^*$ , we have

$$\begin{aligned} \mathcal{L}_{S'}^* - \mathcal{L}_0^* &= (\mathbb{P}_{S'} \ell(\hat{h}_{\text{ERM}}; z) - \mathbb{P}_{S'} \ell(h^*; z)) + (\mathbb{P}_{S'} \ell(h^*; z) - \mathbb{P} \ell(h^*; z)) \\ &\leq \mathbb{P}_{S'} \ell(h^*; z) - \mathbb{P} \ell(h^*; z) \leq \sup_{\mathcal{F}} |(\mathbb{P} - \mathbb{P}_n)f|, \end{aligned}$$

and

$$\begin{aligned} \mathcal{L}_{S'}^* - \mathcal{L}_0^* &= (\mathbb{P}_{S'} \ell(\hat{h}_{\text{ERM}}; z) - \mathbb{P} \ell(\hat{h}_{\text{ERM}}; z)) + (\mathbb{P} \ell(\hat{h}_{\text{ERM}}; z) - \mathbb{P} \ell(h^*; z)) \\ &\geq \mathbb{P}_{S'} \ell(\hat{h}_{\text{ERM}}; z) - \mathbb{P} \ell(\hat{h}_{\text{ERM}}; z) \geq -\sup_{\mathcal{F}} |(\mathbb{P} - \mathbb{P}_n)f|. \end{aligned}$$

Hence we have

$$(\mathcal{L}_{S'}^* - \mathcal{L}_0^*)^2 \leq (\sup_{\mathcal{F}} |(\mathbb{P} - \mathbb{P}_n)f|)^2 \leq \frac{r^*}{64}.$$

Combine this result with (E.21), we have that  $\forall \delta \in (0, \frac{1}{2})$ , with probability  $1 - 2\delta$ ,

$$\begin{aligned} \mathcal{E}(\hat{h}_{\text{MP}}) &\leq 2\psi\left(c_1(\mathcal{V}^* \vee r^*); \frac{\delta}{C_n}\right) \\ &\leq 2\left(\psi\left(c_1\mathcal{V}^*; \frac{\delta}{C_n}\right) \vee \psi\left(c_1r^*; \frac{\delta}{C_n}\right)\right) \\ &\leq 2\psi\left(c_1\mathcal{V}^*; \frac{\delta}{C_n}\right) \vee \frac{c_1r^*}{8B}, \end{aligned}$$

where  $c_1 = \max\{c_0, 16\}$  is an absolute constant, and the last inequality follows from the fact that  $\frac{c_1r^*}{16} > r^*$  and the definition of fixed points. This completes the proof of Theorem 2.  $\square$

### F Proof of Corollary 3

From the definitions, we know that  $\mathcal{L}^* = \mathbb{P}[\ell(h^*; z) - \inf_{\mathcal{H}} \ell(h^*; z)]$ ,  $\widehat{\mathcal{L}}^* = \mathbb{P}_n[\ell(\hat{h}_{\text{ERM}}; z) - \inf_{\mathcal{H}} \ell(h; z)]$  and  $\mathbb{P} \ell(h^*; z) \leq \mathbb{P} \ell(\hat{h}_{\text{ERM}}; z)$ . As a result, we have

$$\begin{aligned} \mathcal{L}^* - \widehat{\mathcal{L}}^* &= \mathbb{P} \ell(h^*; z) - \mathbb{P}_n \ell(\hat{h}_{\text{ERM}}; z) - (\mathbb{P} - \mathbb{P}_n)[\inf_{\mathcal{H}} \ell(h; z)] \\ &\leq (\mathbb{P} - \mathbb{P}_n) \ell(\hat{h}_{\text{ERM}}; z) - (\mathbb{P} - \mathbb{P}_n)[\inf_{\mathcal{H}} \ell(h; z)] \\ &= (\mathbb{P} - \mathbb{P}_n) \hat{f} + (\mathbb{P} - \mathbb{P}_n)[\ell(h^*; z) - \inf_{\mathcal{H}} \ell(h; z)], \end{aligned} \tag{F.1}$$

where  $\hat{f}$  is defined by  $\hat{f}(z) = \ell(\hat{h}_{\text{ERM}}; z) - \ell(h^*; z)$ ,  $\forall z \in \mathcal{Z}$ .

We take  $r_0 = \frac{B^2}{n}$  in Theorem 1, and denote  $C_n := C_{r_0} = 2 \log_2 n + 6$ . From (D.7) in the proof of Theorem 1, on the event  $\mathcal{A}$  defined in (D.3) (whose measure is at least  $1 - \delta$ ),

$$\mathcal{E}(\hat{h}_{\text{ERM}}) \leq (\mathbb{P} - \mathbb{P}_n) \hat{f} \leq \psi(24B\mathcal{L}^* \vee 8r^* \vee \frac{2B^2}{n}; \frac{\delta}{C_n}). \quad (\text{F.2})$$

Since  $3B\mathcal{L}^* \vee r^* \vee \frac{B^2}{4n} \geq r^*$ , from the definition of fixed points we have

$$\begin{aligned} (\mathbb{P} - \mathbb{P}_n) \hat{f} &\leq \psi \left( 8 \left( 3B\mathcal{L}^* \vee r^* \vee \frac{B^2}{4n} \right); \frac{\delta}{C_n} \right) \\ &\leq \frac{3B\mathcal{L}^* \vee r^* \vee \frac{B^2}{4n}}{6B} \leq \frac{\mathcal{L}^*}{2} + \frac{r^*}{6B} + \frac{B}{24n}. \end{aligned} \quad (\text{F.3})$$

This result holds together with the result of Theorem 1 on the event  $\mathcal{A}$ .

The random variable  $\ell(h^*; z) - \inf_{\mathcal{H}} \ell(h; z)$  is uniformly bounded by  $[0, 2B]$ . From Bernstein's inequality and the fact  $\text{Var}[\ell(h^*; z) - \inf_{\mathcal{H}} \ell(h; z)] \leq 2B\mathcal{L}^*$ , with probability at least  $1 - \delta$ ,

$$\left| (\mathbb{P} - \mathbb{P}_n)[\ell(h^*; z) - \inf_{\mathcal{H}} \ell(h; z)] \right| \leq \sqrt{\frac{4B\mathcal{L}^* \log \frac{2}{\delta}}{n}} + \frac{2B \log \frac{2}{\delta}}{n} \leq \frac{\mathcal{L}^*}{4} + \frac{3B \log \frac{2}{\delta}}{n}. \quad (\text{F.4})$$

Consider the event

$$\mathcal{A}_3 = \mathcal{A} \cup \{\text{inequality (F.4) holds true}\},$$

whose measure is at least  $1 - 2\delta$ . On the event  $\mathcal{A}_3$ , from inequalities (F.1) (F.3) (F.4), it is straightforward to show that

$$\mathcal{L}^* - \widehat{\mathcal{L}}^* \leq \frac{3}{4}\mathcal{L}^* + \frac{r^*}{6B} + \frac{4B \log \frac{2}{\delta}}{n},$$

which implies

$$\mathcal{L}^* \leq 4\widehat{\mathcal{L}}^* + \frac{2r^*}{3B} + \frac{16B \log \frac{2}{\delta}}{n}. \quad (\text{F.5})$$

From this result and (F.2), it is straightforward to show that

$$\mathcal{E}(\hat{h}_{\text{ERM}}) \leq \psi \left( cB\widehat{\mathcal{L}}^*; \frac{\delta}{C_n} \right) \vee \frac{cr^*}{n} \vee \frac{cB \log \frac{2}{\delta}}{n},$$

where  $c$  is an absolute constant.

We also have

$$\begin{aligned} \widehat{\mathcal{L}}^* - \mathcal{L}^* &= \mathbb{P}_n \ell(\hat{h}_{\text{ERM}}) - \mathbb{P} \ell(h^*; z) - (\mathbb{P}_n - \mathbb{P})[\inf_{\mathcal{H}} \ell(h; z)] \\ &\leq (\mathbb{P}_n - \mathbb{P}) \ell(h^*; z) - (\mathbb{P}_n - \mathbb{P})[\inf_{\mathcal{H}} \ell(h; z)] \\ &= (\mathbb{P}_n - \mathbb{P})[\ell(h^*; z) - \inf_{\mathcal{H}} \ell(h; z)]. \end{aligned}$$

From this result and (F.4), on the event  $\mathcal{A}_3$ ,

$$\widehat{\mathcal{L}}^* \leq \frac{5}{4}\mathcal{L}^* + \frac{3B \log \frac{2}{\delta}}{n}. \quad (\text{F.6})$$

Combine (F.5) and (F.6) we obtain

$$\mathcal{L}^* \leq c_1 \left( \widehat{\mathcal{L}}^* \vee \frac{r^*}{B} \vee \frac{B \log \frac{2}{\delta}}{n} \right) \leq c_2 \left( \mathcal{L}^* \vee \frac{r^*}{B} \vee \frac{B \log \frac{2}{\delta}}{n} \right),$$

where  $c_1$  and  $c_2$  are absolute constants. This completes the proof.  $\square$

## G Proof of Corollary 4

Define  $\hat{f}_{\text{NMP}}$  by  $\hat{f}_{\text{NMP}}(z) = \ell(\hat{h}_{\text{NMP}}; z) - \ell(h^*; z), \forall z \in \mathcal{Z}$ , and  $w(h; z) = \ell(h; z) - \widehat{\mathcal{L}}_0^*$ . In the proof of Theorem 5, the result (E.16) and the specification of  $\delta_1$  in (E.19) show that with probability at least  $1 - \frac{\delta}{2}$ ,

$$\mathcal{E}(\hat{h}_{\text{MP}}) \leq 2\psi \left( 16\mathbb{P}_n[w(h^*; z)^2] \vee r^*; \frac{\delta}{C_n} \right). \quad (\text{G.1})$$

We also refer to another implication of the proof of Theorem 5. Note that the proof of the result (E.13) does not depend on any property of the estimator  $\hat{h}_{\text{MP}}$ . By repeating the lines between (E.12) and (E.13) for the estimator  $\hat{h}_{\text{NMP}}$ , and use the specification of  $\delta_1$  in (E.19), it is straightforward to show that with probability at least  $1 - \frac{\delta}{2}$ ,

$$(\mathbb{P} - \mathbb{P}_n)\hat{f}_{\text{NMP}} \leq \psi \left( 4\mathbb{P}_n[\hat{f}_{\text{NMP}}^2] \vee r^*; \frac{\delta}{C_n} \right). \quad (\text{G.2})$$

We continue the proof on the event

$$\mathcal{A} := \{\text{the inequalities (G.2) and (G.1) hold true}\},$$

whose measure is at least  $1 - \delta$ .

From the definition of  $\hat{h}_{\text{NMP}}$ ,

$$\mathbb{P}_n \ell(\hat{h}_{\text{NMP}}; z) - 2\psi \left( 16\mathbb{P}_n[w(\hat{h}_{\text{NMP}}; z)^2]; \frac{\delta}{C_n} \right) \leq \mathbb{P}_n \ell(h^*; z) - 2\psi \left( 16\mathbb{P}_n[w(h^*; z)^2]; \frac{\delta}{C_n} \right). \quad (\text{G.3})$$

Therefore, we have

$$\begin{aligned} & 2\psi \left( 16\mathbb{P}_n[w(h^*; z)^2]; \frac{\delta}{C_n} \right) \\ & \leq 2\psi \left( 16\mathbb{P}_n[w(\hat{h}_{\text{NMP}}; z)^2]; \frac{\delta}{C_n} \right) + \mathbb{P}_n \ell(h^*; z) - \mathbb{P}_n \ell(\hat{h}_{\text{NMP}}; z) \\ & = 2\psi \left( 16\mathbb{P}_n[w(\hat{h}_{\text{NMP}}; z)^2]; \frac{\delta}{C_n} \right) + \mathbb{P}[\ell(h^*; z) - \ell(\hat{h}_{\text{NMP}}; z)] + (\mathbb{P}_n - \mathbb{P})[\ell(h^*; z) - \ell(\hat{h}_{\text{NMP}}; z)] \\ & \leq 2\psi \left( 16\mathbb{P}_n[w(\hat{h}_{\text{NMP}}; z)^2]; \frac{\delta}{C_n} \right) + (\mathbb{P} - \mathbb{P}_n)\hat{f}_{\text{NMP}} \\ & \leq 2\psi \left( 16\mathbb{P}_n[w(\hat{h}_{\text{NMP}}; z)^2]; \frac{\delta}{C_n} \right) + \psi \left( 4\mathbb{P}_n[\hat{f}_{\text{NMP}}^2]; \frac{\delta}{C_n} \right), \end{aligned} \quad (\text{G.4})$$

where the first inequality is due to (G.3), the second inequality is due to the fact that  $h^*$  minimizes the population risk; and the last inequality is due to (G.2).

Note that

$$\begin{aligned} 4\mathbb{P}_n[\hat{f}_{\text{NMP}}^2] & \leq 8\mathbb{P}_n[w(\hat{h}_{\text{NMP}}; z)^2] + 8\mathbb{P}_n[w(h^*; z)^2] \\ & \leq 16\mathbb{P}_n[w(\hat{h}_{\text{NMP}}; z)^2] \vee 16\mathbb{P}_n[w(h^*; z)^2]. \end{aligned}$$

From the above inequality and (G.4), we have

$$\begin{aligned} & 2\psi \left( 16\mathbb{P}_n[w(h^*; z)^2]; \frac{\delta}{C_n} \right) \\ & \leq 2\psi \left( 16\mathbb{P}_n[w(\hat{h}_{\text{NMP}}; z)^2]; \frac{\delta}{C_n} \right) + \psi \left( 16\mathbb{P}_n[w(\hat{h}_{\text{NMP}}; z)^2]; \frac{\delta}{C_n} \right) \vee \psi \left( 16\mathbb{P}_n[w(h^*; z)^2]; \frac{\delta}{C_n} \right). \end{aligned} \quad (\text{G.5})$$

Whether  $\mathbb{P}_n[w(h^*; z)^2] \leq 16\mathbb{P}_n[w(\hat{h}_{\text{NMP}}; z)^2]$  or  $\mathbb{P}_n[w(h^*; z)^2] > 16\mathbb{P}_n[w(\hat{h}_{\text{NMP}}; z)^2]$ , the inequality (G.5) always implies

$$\psi \left( 16\mathbb{P}_n[w(h^*; z)^2]; \frac{\delta}{C_n} \right) \leq 2\psi \left( 16\mathbb{P}_n[w(\hat{h}_{\text{NMP}}; z)^2]; \frac{\delta}{C_n} \right) = 2\psi \left( 16\widehat{\mathcal{V}}^*; \frac{\delta}{C_n} \right). \quad (\text{G.6})$$

(Note that  $\widehat{\mathcal{V}}^* := \mathbb{P}_n[w(\hat{h}_{\text{NMP}}; z)^2]$ .) We conclude that with probability at least  $1 - \delta$ ,

$$\begin{aligned} \mathcal{E}(\hat{h}_{\text{MP}}) &\leq 2\psi\left(16\mathbb{P}_n[w(h^*; z)^2] \vee r^*; \frac{\delta}{C_n}\right) \\ &= 2\psi\left(16\mathbb{P}_n[w(h^*; z)^2]; \frac{\delta}{C_n}\right) \vee 2\psi(r^*; \frac{\delta}{C_n}) \\ &\leq 4\psi\left(16\widehat{\mathcal{V}}^*; \frac{\delta}{C_n}\right) \vee \frac{r^*}{8B}, \end{aligned}$$

where the first inequality is due to (G.1) and the last inequality is due to (G.6). This completes the proof.  $\square$

## H Auxiliary lemmas

**Lemma 3 (Dudley's integral bound, [14]).** *Given  $r > 0$  and a class  $\mathcal{F}$  that consists of functions defined on  $\mathcal{Z}$ ,*

$$\mathfrak{R}_n\{f \in \mathcal{F} : \mathbb{P}_n[f^2] \leq r\} \leq \inf_{\varepsilon_0 > 0} \left\{ 4\varepsilon_0 + 12 \int_{\varepsilon_0}^{\sqrt{r}} \sqrt{\frac{\log \mathcal{N}(\varepsilon, \mathcal{F}, L_2(\mathbb{P}_n))}{n}} d\varepsilon \right\}.$$

**Lemma 4 (Talagrand's concentration inequality for empirical processes, [2]).** *Let  $\mathcal{F}$  be a class of functions that map  $\mathcal{Z}$  into  $[B_1, B_2]$ . Assume that there is some  $r > 0$  such that for every  $f \in \mathcal{F}$ ,  $\text{Var}[f(z_i)] \leq r$ . Then, for every  $\delta \in (0, 1)$ , with probability at least  $1 - \delta$ ,*

$$\sup_{f \in \mathcal{F}} (\mathbb{P} - \mathbb{P}_n)f \leq 3\mathfrak{R}\mathcal{F} + \sqrt{\frac{2r \log \frac{1}{\delta}}{n}} + (B_2 - B_1) \frac{\log \frac{1}{\delta}}{n},$$

and with probability at least  $1 - \delta$ ,

$$\sup_{f \in \mathcal{F}} (\mathbb{P} - \mathbb{P}_n)f \leq 4\mathfrak{R}_n\mathcal{F} + \sqrt{\frac{2r \log \frac{2}{\delta}}{n}} + \frac{9}{2}(B_2 - B_1) \frac{\log \frac{2}{\delta}}{n}.$$

Moreover, the same results hold for the quantity  $\sup_{f \in \mathcal{F}} (\mathbb{P}_n - \mathbb{P})f$ .

**Lemma 5 (Bernstein's inequality).** *Let  $X_1, \dots, X_n$  be real-valued, independent, mean-zero random variables and suppose that for some constants  $\sigma, B > 0$ ,*

$$\frac{1}{n} \sum_{i=1}^n \mathbb{E}|X_i|^k \leq \frac{k!}{2} \sigma^2 B^{k-2}, \quad k = 2, 3, \dots$$

Then,  $\forall \delta \in (0, 1)$ , with probability at least  $1 - \delta$

$$\left| \frac{1}{n} \sum_{i=1}^n X_i \right| \leq \sqrt{\frac{2\sigma^2 \log \frac{2}{\delta}}{n}} + \frac{B \log \frac{2}{\delta}}{n}. \quad (\text{H.1})$$
